# Supplementary material
Source: PubMed Central journal article supplement (PMC6401283)
Supplement: NIHMS1513195-supplement-1.pdf [file NIHMS1513195-supplement-1.pdf]

**Figure S1.** Overview of the study selection process for meta-analysis

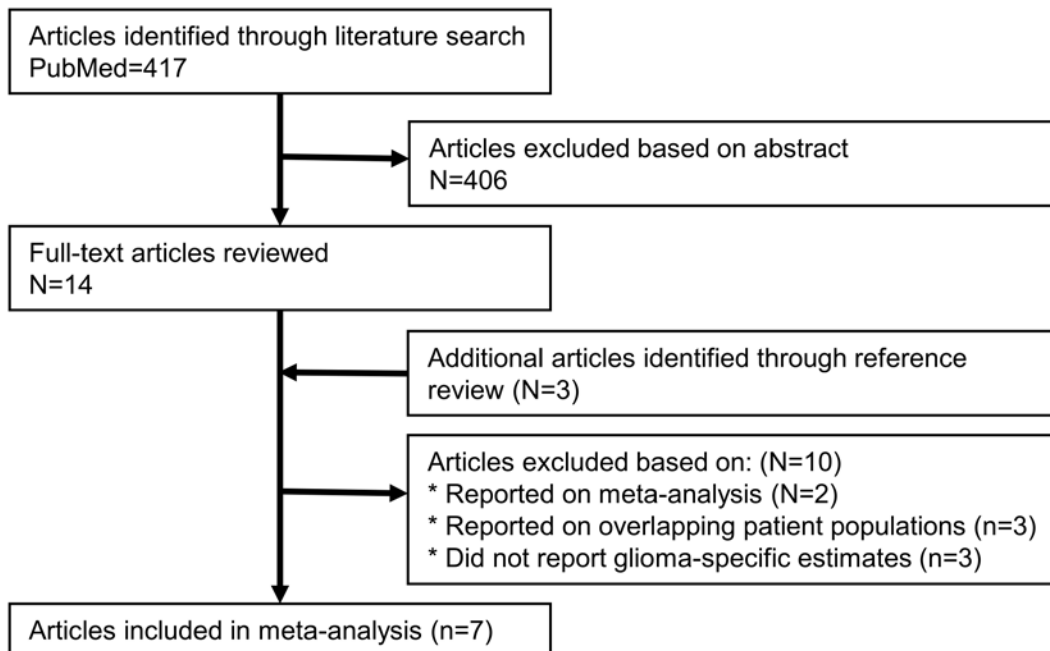

**Figure S2A.** Forest plot representing the meta-analysis of six studies on aspirin use and glioma risk.

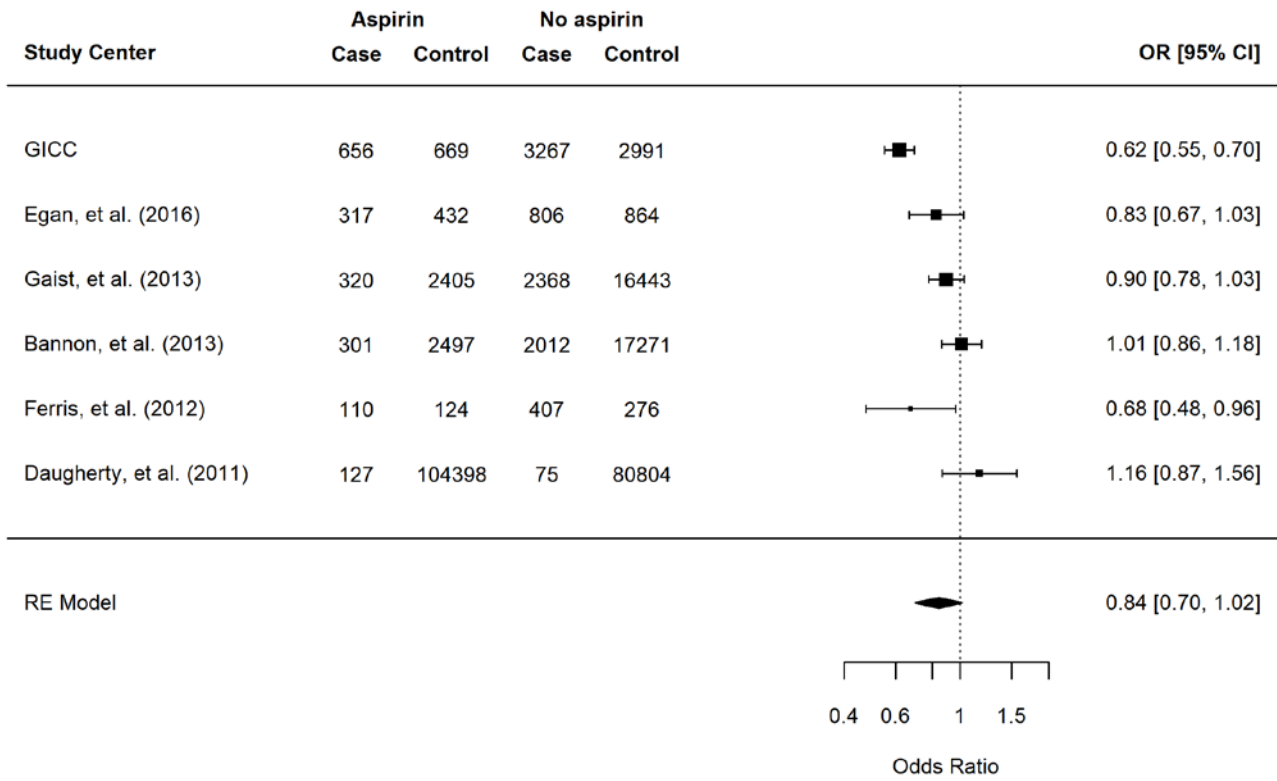

**Figure S2B.** Funnel plot representing the meta-analysis of six studies on aspirin use and glioma risk.

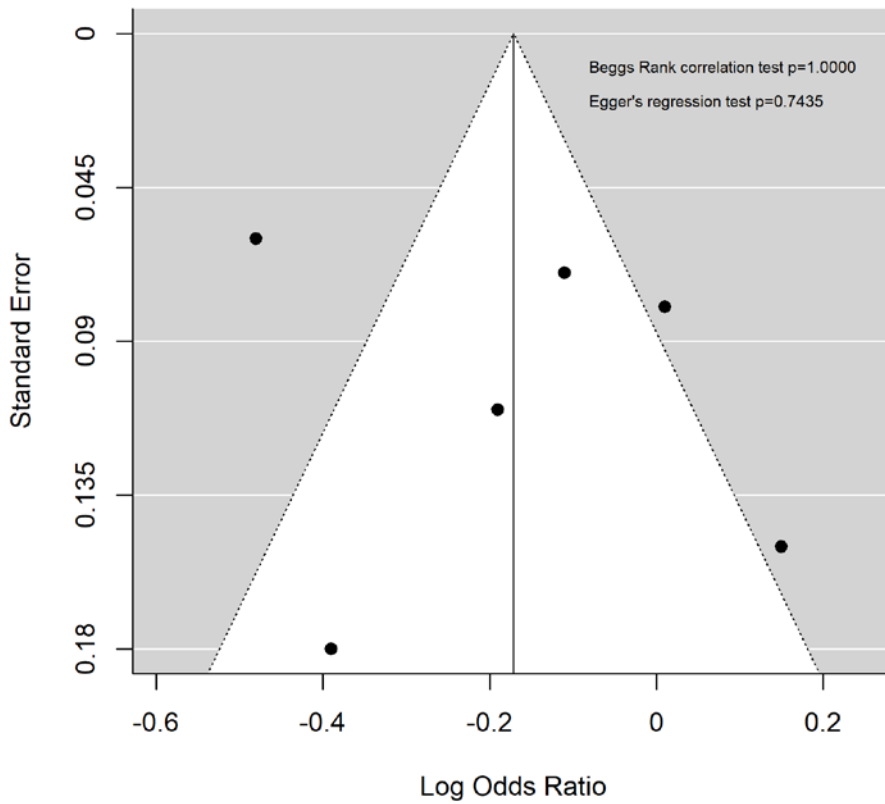

**Figure S3A.** Forest plot representing the meta-analysis of four studies on aspirin use and glioma risk, including studies based on US patients only.

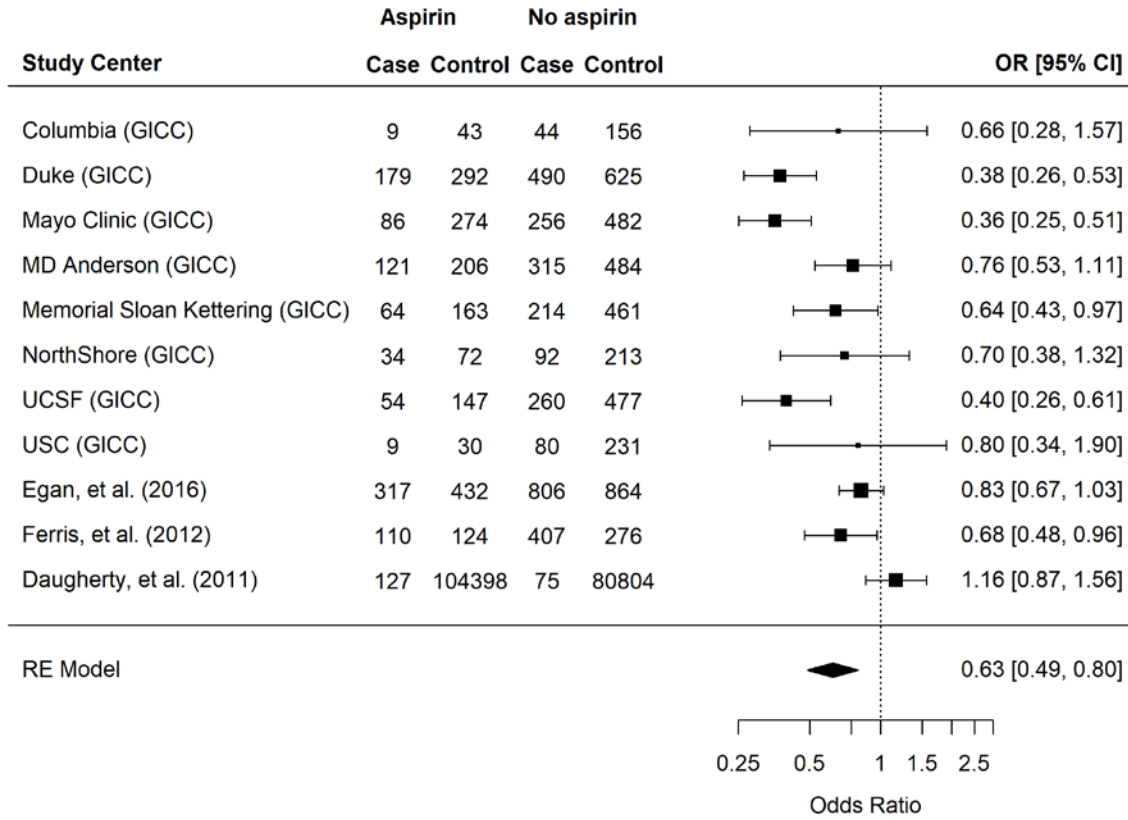

**Figure S3B.** Funnel plot representing the meta-analysis of four studies on aspirin use and glioma risk, including studies based on US patients only.

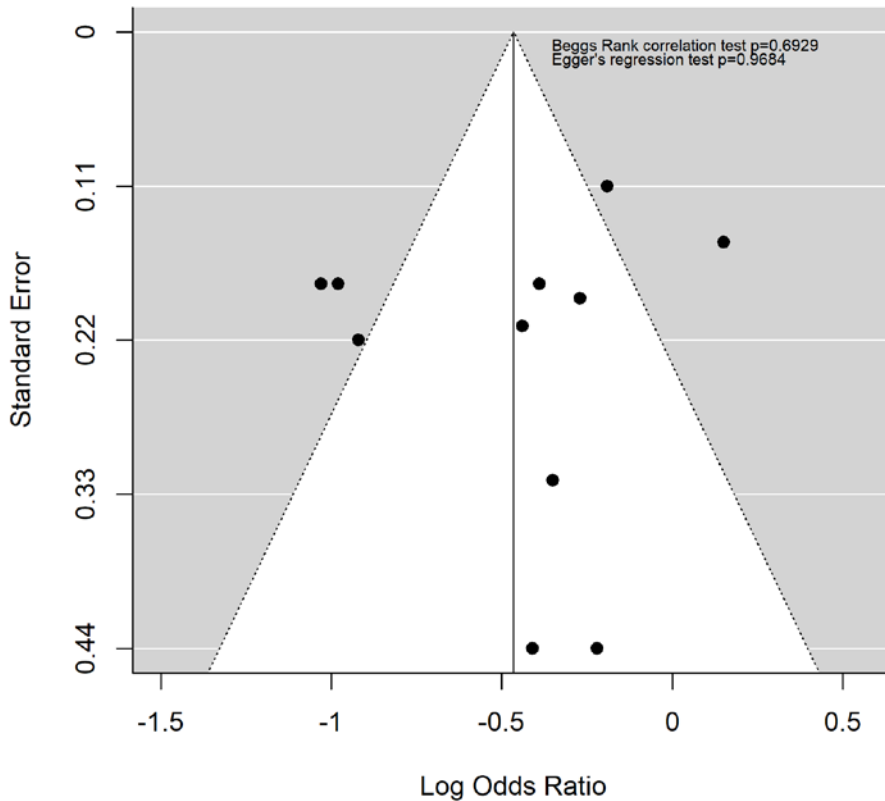

**Figure S4A.** Forest plot representing the meta-analysis of five studies on long-term aspirin use and glioma risk.

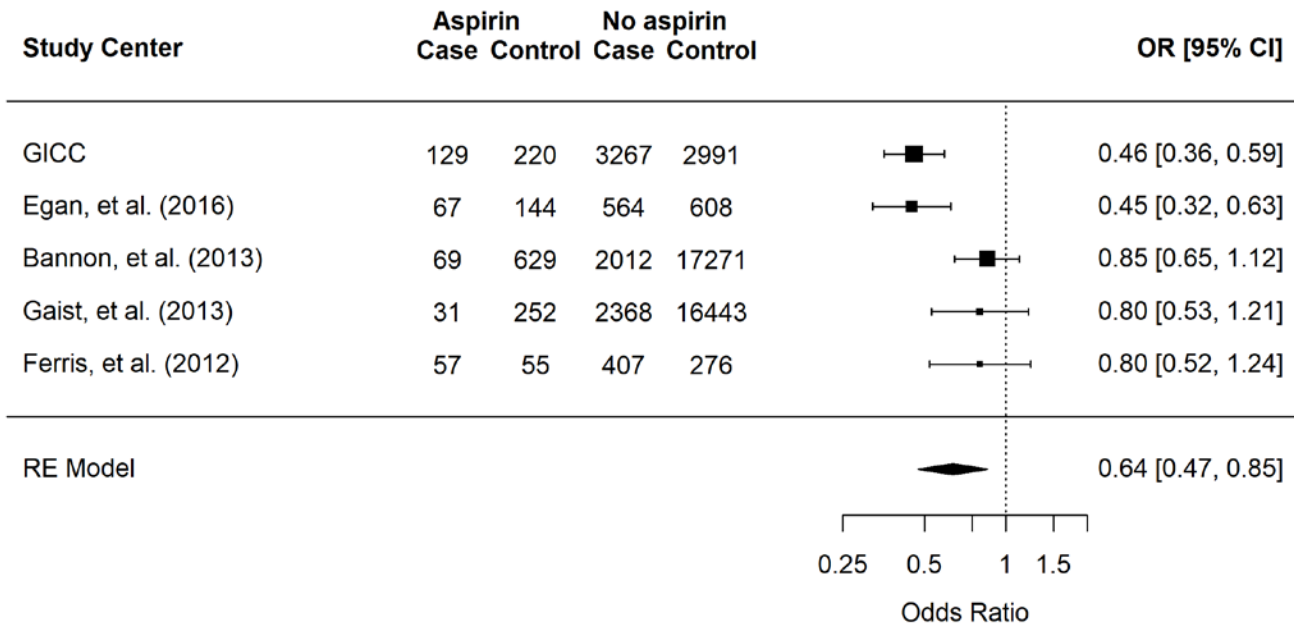

Gaist et al. and Ferris et al. defined long-term as  $\geq 5$  years; GICC and Egan et al. defined long-term as  $\geq 10$  years; Bannon et al. as  $\geq 1573$  daily doses ( $\sim 4.3$  years).

**Figure S4B.** Funnel plot representing the meta-analysis of five studies on long-term aspirin use and glioma risk.

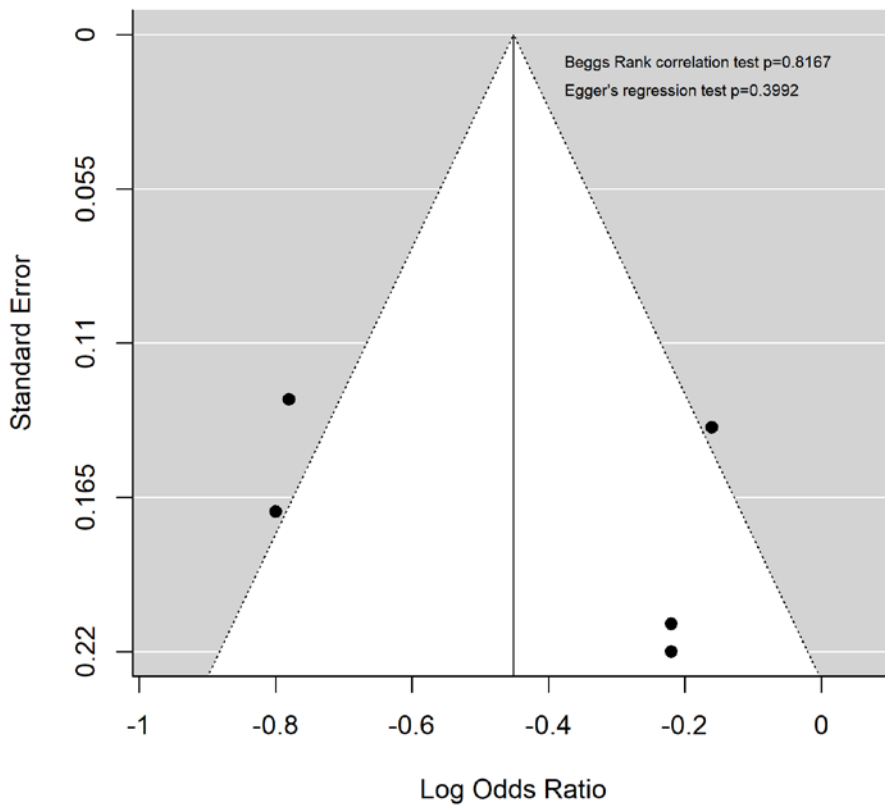

**Figure S5A.** Forest plot representing the meta-analysis of four studies on long-term aspirin use and glioblastoma risk.

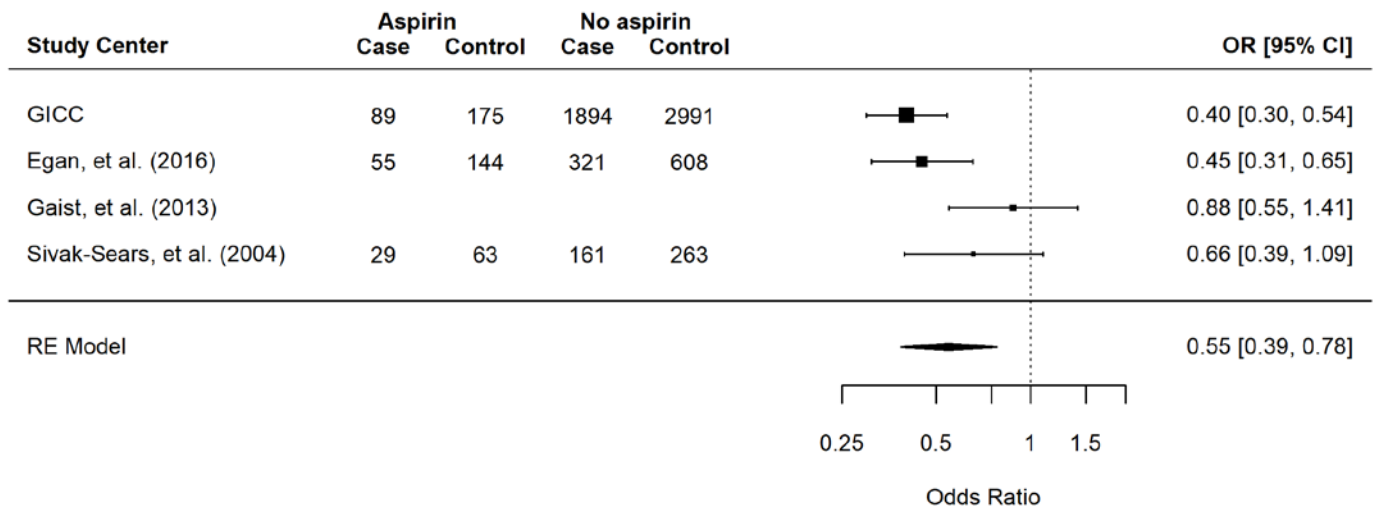

Gaist et al. defined long-term as  $\geq 5$  years; GICC, Egan, et al., and Sivak-Sears, et al. defined long-term as  $\geq 10$  years; Counts not available for Gaist, et al.

**Figure S5B.** Forest plot representing the meta-analysis of four studies on long-term aspirin use and glioblastoma risk.

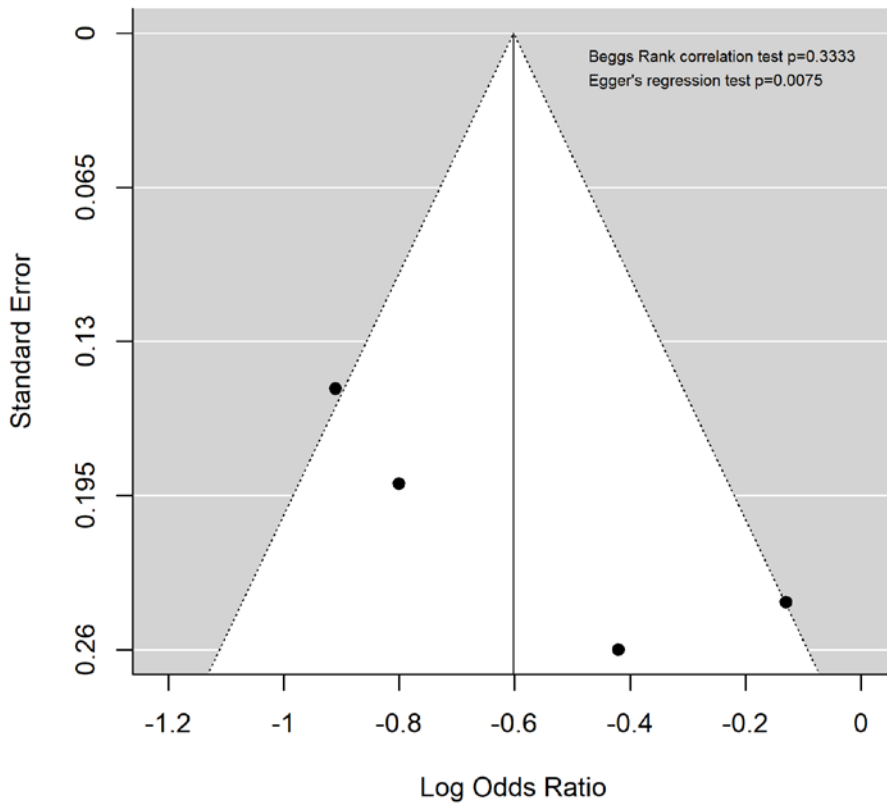

**Figure S6A.** Forest plot representing the meta-analysis of seven studies on NSAID use and glioma risk.

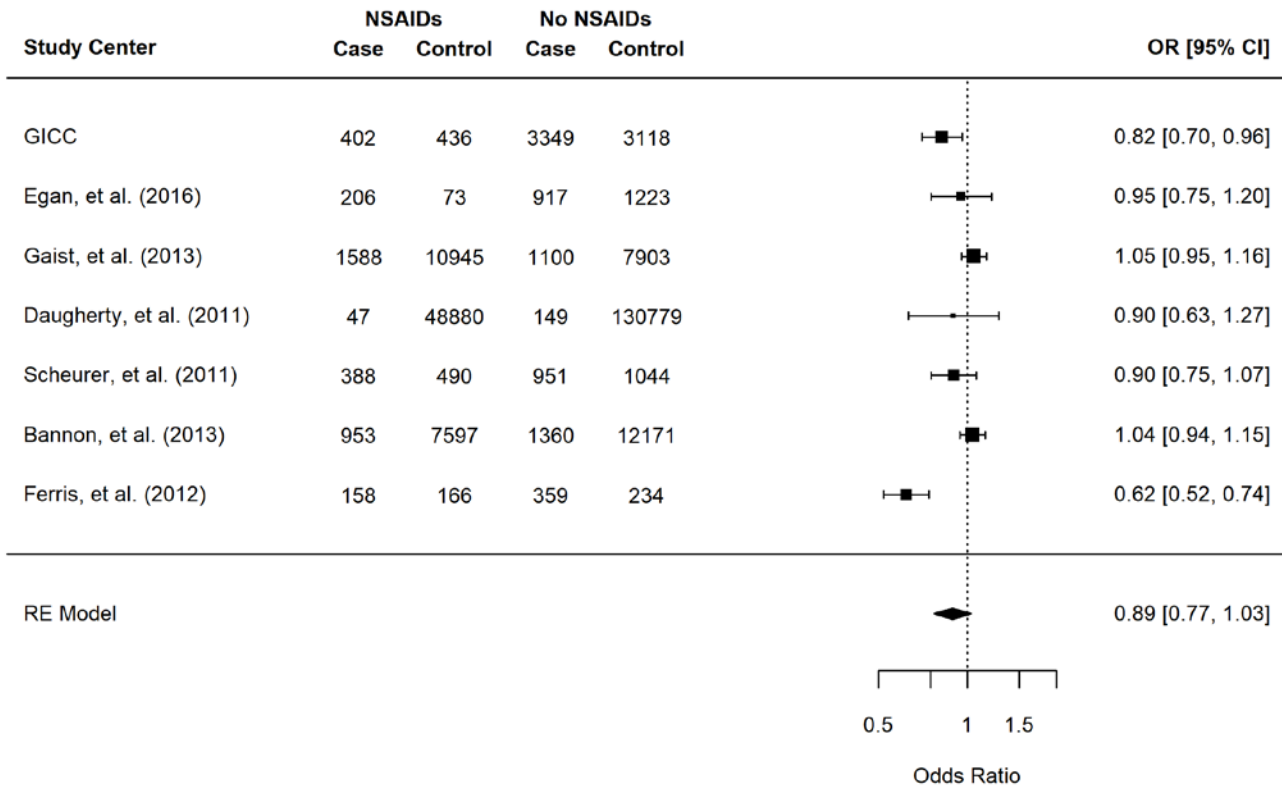

**Figure S6B.** Forest plot representing the meta-analysis of seven studies on NSAID use and glioma risk.

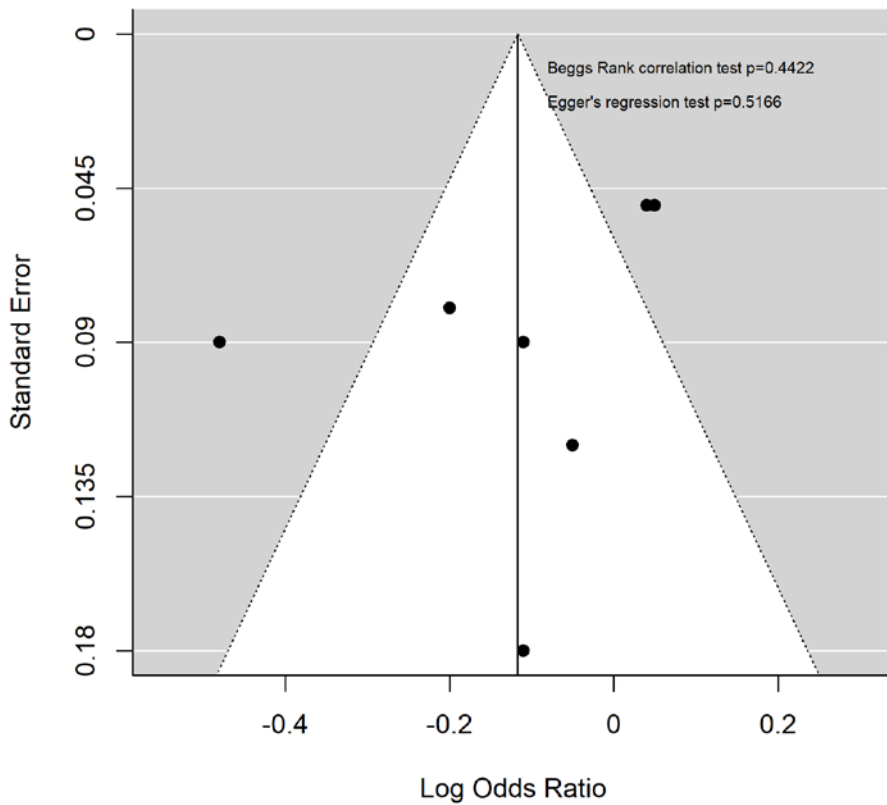

**Figure S7A.** Forest plot representing the meta-analysis of five studies on non-aspirin NSAID use and glioma risk.

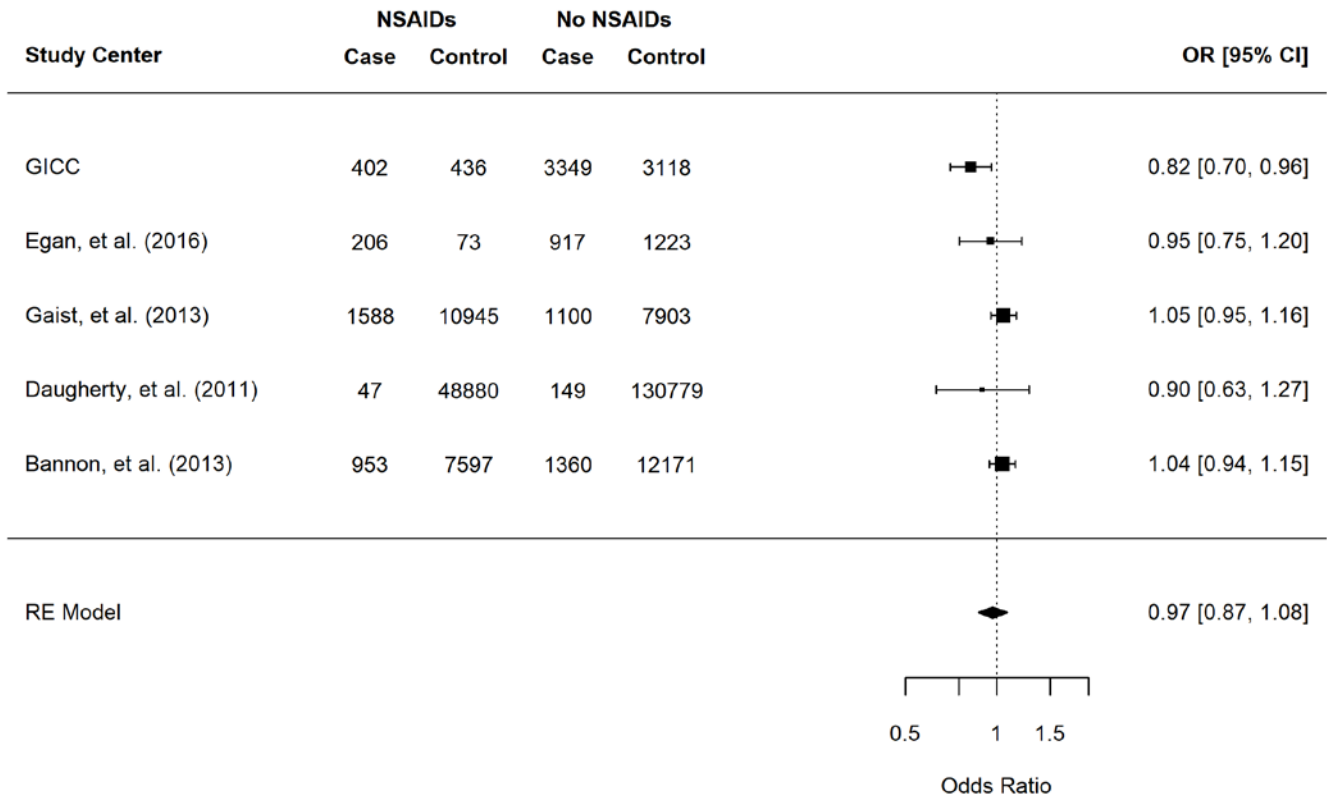

**Figure S7B.** Forest plot representing the meta-analysis of five studies on non-aspirin NSAID use and glioma risk.

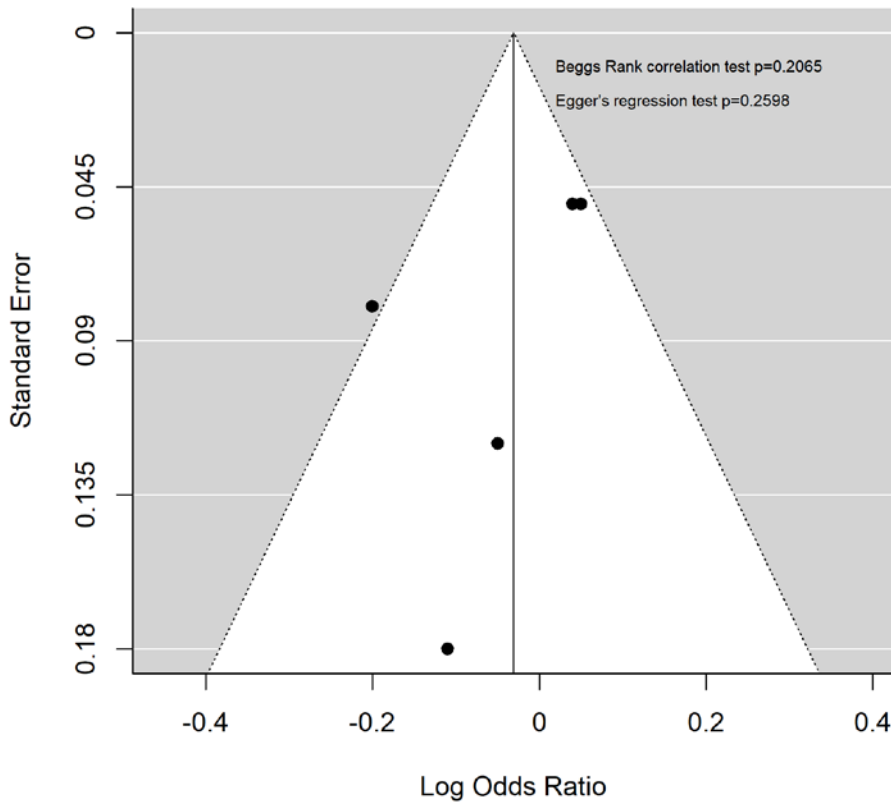

**Table S1.** Details and characteristics of included studies on aspirin, non-steroidal anti-inflammatory drugs, and glioma

| First Author (Year)<br><i>Study design</i>                                                                       | Phenotype            | Exposures                                                   | Risk measure | Time points and exposure definition                                                                                                                                                                                                                                                                                 | Source of study population [Country]                                                                                                                                | Glioma cases | GBM cases (% of all glioma cases) | Controls (Type)                                    | Adjustments used in analyses                                                              | Newcastle-Ottawa quality score (1) |
|------------------------------------------------------------------------------------------------------------------|----------------------|-------------------------------------------------------------|--------------|---------------------------------------------------------------------------------------------------------------------------------------------------------------------------------------------------------------------------------------------------------------------------------------------------------------------|---------------------------------------------------------------------------------------------------------------------------------------------------------------------|--------------|-----------------------------------|----------------------------------------------------|-------------------------------------------------------------------------------------------|------------------------------------|
| Bannon, et al. (2013) (2)<br><i>Retrospective case control</i>                                                   | All glioma           | Aspirin; Non-aspirin NSAIDs                                 | Odds ratio   | Aspirin:<br>Ever use vs never use<br>1-224 daily doses [DD] vs never use<br>225-728 DD vs never use<br>729-1572 DD vs never use<br>>= 1573 DD vs never use<br><br>Non-aspirin NSAIDs:<br>Ever use vs never use<br>1-28 DD vs never use<br>29-65 DD vs never use<br>66-212 DD vs never use<br>>= 213 DD vs never use | U.K.-based Clinical Practice Research Datalink (CPRD) - 1987-2009 [UK]                                                                                              | 2,313        | Unknown                           | 19,768 (Population/national primary care database) | Patients are matched on age, gender and general practitioner practice (geographic region) | 7                                  |
| Daugherty, et al. (2011) (3)<br><i>Cohort</i>                                                                    | All glioma; GBM      | Aspirin; Non-aspirin NSAIDs                                 | Hazard ratio | Regular use vs never use<br>>2-6 times/week vs never use<br>>=7 times/week vs never use                                                                                                                                                                                                                             | National Institutes of Health (NIH)-AARP Diet and Health Study [US]                                                                                                 | 341          | 264 (77.4%)                       | 302,426                                            | Adjusted for sex, race, and history of heart disease using age as time metric             | 7                                  |
| Egan, et al. (2016) (4)<br><i>Case-control study recruiting incidence cases and matched controls</i>             | All Glioma; GBM; LGG | Acetaminophen; Aspirin; Non-aspirin NSAIDs; COX2-inhibitors | Odds ratio   | Regular use vs never use<br><3 years of regular use vs never use<br>4-9 years of regular use vs never use<br>>=10 years of regular use vs never use                                                                                                                                                                 | Glioma South-East (GliomaSE) case-control study [US]                                                                                                                | 1,123        | 509 (45.3%)                       | 1,296 (Community [-90%] and family [-10%])         | Adjusted for age, gender, race, education, and state of residence                         | 6                                  |
| Ferris, et al. (2012) (5)<br><i>Case-control study recruiting incidence cases and frequency matched controls</i> | All glioma           | Aspirin; All NSAIDs                                         | Odds ratio   | >6 months of regular use vs <= 6 months of regular use<br>7-24 months of regular use vs <= 6 months of regular use<br>25-60 months of regular use vs <= 6 months of regular use<br>61-120 months of regular use vs <= 6 months of regular use                                                                       | Columbia University Medical Center (CUMC) and the University of California San Francisco (Northern California Cancer Center's rapid case ascertainment system) [US] | 517          | 317 (61.3%)                       | 400 (Hospital)                                     | Adjusted for individual NSAIDs, acetaminophen, statins, age, race, sex and center.        | 6                                  |
| Gaist, et al. (2013) (6)<br><i>Retrospective case control</i>                                                    | All glioma; GBM      | Aspirin; Non-aspirin NSAIDs                                 | Odds ratio   | Ever use vs never use<br>Recent use vs never use<br>Past use vs never use<br><br><2 vs never use (recent use)                                                                                                                                                                                                       | Danish Cancer Registry (DCR), Civil Registration System, National Prescription Registry, Danish National Registry of                                                | 2,688        | 1561 (58.1%)                      | 18,848 (Population)                                | Matched on birth year and sex. Adjusted for education, diabetes, stroke, allergy, asthma, | 7                                  |



|                                                                                                                       |                                         |                       |            |                                                                |                                                                                                     |       |             |                                                         |                                                            |   |
|-----------------------------------------------------------------------------------------------------------------------|-----------------------------------------|-----------------------|------------|----------------------------------------------------------------|-----------------------------------------------------------------------------------------------------|-------|-------------|---------------------------------------------------------|------------------------------------------------------------|---|
|                                                                                                                       |                                         |                       |            | 2-4 vs never use (recent use)<br>>=5 vs never use (recent use) | Patients (DNRP), and Danish education and fertility registries within Statistics Denmark. [Denmark] |       |             |                                                         | use of statins, antihistamines, and anti-asthma medication |   |
| Scheurer, et al. (2011) (7)<br><i>Case-control study recruiting incidence cases and matched controls</i>              | All glioma; GBM; Anaplastic glioma; LGG | All anti-inflammatory | Odds ratio | >=6 months of regular use vs <6 months of use                  | San Francisco Adult Glioma Study and Harris County case-control study [US]                          | 1,339 | 806 (60.2%) | 1,534 (Population, recruited with random digit dialing) | Adjusted for age, race, sex, education, and study series.  | 7 |
| Sivak-Sears, et al. (2004) (8)<br><i>Case-control study recruiting incidence cases and frequency matched controls</i> | All glioma                              | Aspirin               | Odds ratio | >=10 years vs never use<br>Regular vs never use                | San Francisco Adult Glioma Study [US]                                                               | 510   | 241 (47.3%) | 541 (Population, recruited with random digit dialing)   | Adjusted for Age                                           | 7 |

#### References

1. Wells G, Shea B, O'Connell D, Peterson J, Welch V, Losos M, *et al.* 2000 August 21, 2018. The Newcastle-Ottawa Scale (NOS) for assessing the quality of nonrandomised studies in meta-analyses. <[http://www.ohri.ca/programs/clinical\\_epidemiology/oxford.asp](http://www.ohri.ca/programs/clinical_epidemiology/oxford.asp)>. August 21, 2018.
2. Bannon FJ, O'Rorke MA, Murray LJ, Hughes CM, Gavin AT, Fleming SJ, *et al.* Non-steroidal anti-inflammatory drug use and brain tumour risk: a case-control study within the Clinical Practice Research Datalink. *Cancer Causes Control* **2013**;24(11):2027-34 doi 10.1007/s10552-013-0279-9.
3. Daugherty SE, Moore SC, Pfeiffer RM, Inskip PD, Park Y, Hollenbeck A, *et al.* Nonsteroidal anti-inflammatory drugs and glioma in the NIH-AARP Diet and Health Study cohort. *Cancer Prev Res (Phila)* **2011**;4(12):2027-34 doi 10.1158/1940-6207.CAPR-11-0274.
4. Egan KM, Nabors LB, Thompson ZJ, Rozmeski CM, Anic GA, Olson JJ, *et al.* Analgesic use and the risk of primary adult brain tumor. *European journal of epidemiology* **2016**;31(9):917-25 doi 10.1007/s10654-016-0129-7.
5. Ferris JS, McCoy L, Neugut AI, Wrensch M, Lai R. HMG CoA reductase inhibitors, NSAIDs and risk of glioma. *International journal of cancer* **2012**;131(6):E1031-7 doi 10.1002/ijc.27536.
6. Gaist D, Garcia-Rodriguez LA, Sorensen HT, Hallas J, Friis S. Use of low-dose aspirin and non-aspirin nonsteroidal anti-inflammatory drugs and risk of glioma: a case-control study. *Br J Cancer* **2013**;108(5):1189-94 doi 10.1038/bjc.2013.87.
7. Scheurer ME, Amirian ES, Davlin SL, Rice T, Wrensch M, Bondy ML. Effects of antihistamine and anti-inflammatory medication use on risk of specific glioma histologies. *International journal of cancer* **2011**;129(9):2290-6 doi 10.1002/ijc.25883.
8. Sivak-Sears NR, Schwartzbaum JA, Miike R, Moghadassi M, Wrensch M. Case-control study of use of nonsteroidal antiinflammatory drugs and glioblastoma multiforme. *Am J Epidemiol* **2004**;159(12):1131-9 doi 10.1093/aje/kwh153.
